# Supplementary material for: Arabidopsis thaliana Chromosome 4 Replicates in Two Phases That Correlate with Chromatin State
Source: PLoS Genet. 2010 Jun 10;6(6):e1000982. doi: 10.1371/journal.pgen.1000982 (PMC2883604; doi:10.1371/journal.pgen.1000982)
Supplement: Table S3 — Sequence and chromosome position of real time qPCR primer sets used for microarray data validation. (0.07 MB DOC) [file pgen.1000982.s008.doc]

**Table S3**. Sequence and chromosome position of real time qPCR primer sets used for microarray data validation

| Replication  timing | Primer | Sequence (5’  3’) | Coordinate | |
| --- | --- | --- | --- | --- |
| Start (bp) | End (bp) |
| Early | E1 forward | AAGGGTCTAACTCTCACAAGTACTACG | 723,123 | 724,054 |
| E1 reverse | CCTACACGTGTCGACTCTCTAATGATCC |
| E2 forward | TCCGTACGGTCTCGTTTCTTTGCT | 12,373,143 | 12,374,113 |
| E2 reverse | GGTTGTGAGTCTTGTCTCTTCTGCCA |
| E3 forward | ACGCATTGCCGCATTGGCTAACAA | 14,353,959 | 14,354,449 |
| E3 reverse | AGGCAGACAATGACAGTGATGTGA |
| E4 forward | AACATGCGCCATCCTCTTACTGGA | 17,745,385 | 17,746,223 |
| E4 reverse | AGCGCCTGCGAGTGTATTGATAGT |
| E5 forward | ATACGAGGAAGTCAAGCACGTTAAGC | 18,445,846 | 18,446,851 |
| E5 reverse | ATTGGTCGCCGTAAGATTTCAAGTTCG |
| Late | L1 forward | CGCAAAGAGACACGTGCTCCTAGTTA | 4,631,993 | 4,632,771 |
| L1 reverse | GCTGCCTCTTTAAAGGTGGTTGGT |
| L2 forward | TTTCTTGGCCTCCCTCCAGTCTTT | 5,961,721 | 5,962,701 |
| L2 reverse | ATCTGCATTCAACCAGCAACACCC |
| L3 forward | ATAAGCCTCTGCTTCACCAAGGGA | 9,622,274 | 9,622,788 |
| L3 reverse | CGGTTTCTCAGTTGCGCTTGACAT |
| L4 forward | ACCAAGGATCATTTGGAGGTGGCT | 12,202,922 | 12,203,918 |
| L4 reverse | AACGATGAGGACGTTGGATACTGG |
| L5 forward | CCAAATTCAGTACCGTAGATTGAGCTGT | 14,481,629 | 14,482,054 |
| L5 reverse | ACGTGAACTTCTGGTCGACAGTGA |
| Mid | M1 forward | ACCTTCAAGGGTTTGAATTTCTTGAGC | 706,389 | 707,350 |
| M1 reverse | GTTGGCATTAAACTACAGGTGGTCATC |
| M2 forward | TGTTCACCTGTGGCTATCTTGTATTC | 18,295,361 | 18,296,365 |
| M2 reverse | TAGAGCCGACGATGTCATCAATGC |
| Intermediate | Inter1 forward | TCAACACTCTTAGTGGAAGGTTGACTCT | 12,120,612 | 12,121,166 |
| Inter1 reverse | CTGCAGAAGCAAGAGAGTTTGTGAGG |
| Inter2 forward | CAAATGGCAATGCGCAGCTTCAAC | 14,461,366 | 14,462,408 |
| Inter2 reverse | TGTCGTTTAGAAAGGCAGGGAGGA |
