# Supplementary material for: Arabidopsis thaliana Chromosome 4 Replicates in Two Phases That Correlate with Chromatin State
Source: PLoS Genet. 2010 Jun 10;6(6):e1000982. doi: 10.1371/journal.pgen.1000982 (PMC2883604; doi:10.1371/journal.pgen.1000982)
Supplement: Table S5 — Segments of coordinate replication time for chr4. (0.03 MB XLS) [file pgen.1000982.s010.xls]

## Sheet: final.loess.segments.txt
Table S5. Segments of coordinate replication time for chr4
low_coord	high_coord	timing	length
1027	32632	I	31606
32896	36265	E	3370
36262	71143	EL	34882
71124	170300	L	99177
170260	193398	ML	23139
193378	283459	L	90082
283713	287804	ML	4092
287783	379161	M	91379
379137	384166	I	5030
384220	446498	L	62279
446641	468682	ML	22042
468659	478222	M	9564
478233	496069	EM	17837
496049	497036	E	988
497125	504614	I	7490
504624	577817	L	73194
577768	591831	ML	14064
591806	626285	EML	34480
626420	655699	EM	29280
655881	676090	EML	20210
676303	755603	EM	79301
755708	763779	M	8072
763285	767267	I	3983
767302	817170	L	49869
817143	837467	EML	20325
837490	859664	EM	22175
859729	897757	EML	38029
897897	964510	EM	66614
964492	991266	M	26775
991254	1076946	EM	85693
1076991	1098485	M	21495
1098473	1100030	EM	1558
1100010	1114446	ML	14437
1100010	1101023	EML	1014
1114448	1251047	L	136600
1251031	1262027	ML	10997
1262014	1268799	EML	6786
1268565	1314801	EM	46237
1314756	1329360	M	14605
1329417	1335616	I	6200
1335725	1352226	L	16502
1352212	1368564	ML	16353
1368606	1538686	L	170081
1538775	1584121	ML	45347
1584201	1705382	L	121182
1736828	1850727	L	113900
1850278	1890504	EL	40227
1890600	2310279	L	419680
2310257	2311266	EL	1010
2310786	2346695	E	35910
2346861	2347837	I	977
2347917	2390783	L	42867
2390956	2398739	EL	7784
2398542	2438363	EML	39822
2437891	2451734	ML	13844
2451822	2484231	L	32410
2484013	2507084	I	23072
2507064	2519288	L	12225
2519439	2538304	EL	18866
2538280	2581315	EML	43036
2580883	2586907	EM	6025
2586884	2587863	E	980
2587908	2609245	I	21338
2609399	2619940	L	10542
2620023	2628547	ML	8525
2628529	2638945	EML	10417
2639093	2676075	ML	36983
2675941	2758218	L	82278
2758350	2789948	EL	31599
2790142	2919118	L	128977
2968034	3197086	L	229053
3197148	3272594	EL	75447
3278058	3966497	L	688440
3625306	3629278	I	3973
3987248	3998743	L	11496
4011317	4051974	L	40658
4052025	4092140	I	40116
4091789	5274879	L	1183091
5274860	5288112	I	13253
5288140	5718278	L	430139
5718335	5726096	EL	7762
5726135	5779474	EML	53340
5779723	5782760	EL	3038
5782891	6420523	L	637633
6420518	6440301	ML	19784
6440338	6789337	L	349000
6556980	6562026	EL	5047
6789317	6798823	EL	9507
6798802	6842289	EML	43488
6842263	6902563	EM	60301
6902785	6914298	M	11514
6914273	6921114	I	6842
6921194	7158164	L	236971
7157163	7172207	ML	15045
7172164	7196970	M	24807
7196961	7251786	EM	54826
7251766	7264861	M	13096
7264766	7289026	I	24261
7289008	7305174	M	16167
7305343	7446445	EM	141103
7446539	7452161	M	5623
7451154	7452161	ML	1008
7452117	7548696	L	96580
7547696	7556090	ML	8395
7555766	7565207	EML	9442
7565413	7602133	EM	36721
7602140	7629912	EML	27773
7629976	7650832	EL	20857
7650945	7945114	L	294170
7945355	7955098	ML	9744
7955131	8062206	L	107076
8062244	8075072	ML	12829
8075093	8232249	L	157157
8232213	8236069	I	3857
8236049	8264785	M	28737
8264765	8293329	EM	28565
8293289	8304256	EML	10968
8304427	8315194	ML	10768
8315237	8334971	L	19735
8335135	8341327	EL	6193
8341431	8347437	E	6007
8347418	8477182	EM	129765
8477274	8491566	M	14293
8491564	8508905	I	17342
8508884	8833461	L	324578
8833454	8854817	I	21364
8854797	8856906	E	2110
8856938	8895964	EL	39027
8895942	9124726	L	228785
9124705	9127583	ML	2879
9127563	9166044	EML	38482
9166117	9170692	ML	4576
9170672	9174530	L	3859
9173995	9192337	I	18343
9192394	9242190	L	49797
9242212	9257134	ML	14923
9257144	9303703	EML	46560
9303726	9314862	ML	11137
9314837	9329918	M	15082
9329961	9474136	EM	144176
9474153	9484120	M	9968
9484131	9493170	I	9040
9493377	9704021	L	210645
9703713	9716263	ML	12551
9715571	9722695	EML	7125
9722675	9926946	EM	204272
9797318	9805876	EML	8559
9926899	10039123	EML	112225
10039103	10186345	EM	147243
10185368	10228791	EML	43424
10228771	10401699	EM	172929
10401794	10405071	EML	3278
10405051	10417324	ML	12274
10416711	10459162	L	42452
10459140	10464248	ML	5109
10464298	10470547	M	6250
10470744	10510226	EM	39483
10510436	10514266	M	3831
10514249	10536738	I	22490
10536800	10562658	L	25859
10562638	10565654	ML	3017
10565633	10567647	EML	2015
10567631	10616224	EM	48594
10616239	10623384	EML	7146
10623515	10676936	L	53422
10623515	10624364	EL	850
10676993	10687388	ML	10396
10687632	10693507	EML	5876
10693698	10745568	EM	51871
10745770	10747330	E	1561
10747310	10806395	L	59086
10806445	10810915	ML	4471
10811065	10826855	M	15791
10826835	10837256	EM	10422
10837540	10841480	M	3941
10841546	10853082	ML	11537
10853067	10926759	L	73693
10926728	10935314	ML	8587
10935445	10941392	EML	5948
10941372	11005353	EM	63982
11005304	11008289	EML	2986
11008273	11014647	ML	6375
11014768	11130650	L	115883
11130624	11131618	EL	995
11131637	11183403	EML	51767
11183383	11359691	ML	176309
11359803	11379658	M	19856
11379748	11437519	EM	57772
11437606	11454408	M	16803
11454449	11457272	ML	2824
11457480	11512993	L	55514
11512973	11523256	ML	10284
11523240	11600087	EML	76848
11600067	11672821	EM	72755
11671797	11684135	EML	12339
11684143	11730593	ML	46451
11730573	11731408	M	836
11731547	11783720	EM	52174
11782825	11809949	M	27125
11809902	11842516	ML	32615
11842496	11861121	EML	18626
11860246	11921058	EM	60813
11921055	11926380	EML	5326
11926379	11959821	EL	33443
11959858	12018706	EM	58849
12018666	12035934	EML	17269
12035931	12113308	EM	77378
12113383	12118834	EML	5452
12118928	12227474	L	108547
12227454	12228460	EL	1007
12228598	12255462	EML	26865
12255443	12551715	EM	296273
12551696	12597236	M	45541
12597217	12607739	I	10523
12607924	12679894	L	71971
12680029	12720417	ML	40389
12720397	12722954	M	2558
12723012	12796164	EM	73153
12796144	12806015	M	9872
12806292	12810764	ML	4473
12810841	12829266	L	18426
12829456	12838086	ML	8631
12838066	12839092	M	1027
12839293	12869136	EM	29844
12869246	12875865	EML	6620
12875922	12936314	ML	60393
12935348	12955868	EML	20521
12956002	13143159	EM	187158
13143140	13153049	EML	9910
13153028	13182901	ML	29874
13182869	13183854	EML	986
13183834	13316498	EM	132665
13316663	13350244	ML	33582
13316663	13316992	EML	330
13350203	13395036	L	44834
13395013	13419376	ML	24364
13419524	13461202	EML	41679
13461181	13536401	EM	75221
13536681	13540030	M	3350
13540010	13546435	I	6426
13546405	13622304	L	75900
13622282	13625731	ML	3450
13625806	13631931	M	6126
13632199	13742997	EM	110799
13742999	13790378	ML	47380
13763873	13770055	L	6183
13790358	13790804	EML	447
13790801	13930333	EM	139533
13930454	13942384	M	11931
13942364	13953933	ML	11570
13954044	13976409	M	22366
13976590	14140731	EM	164142
14140733	14158804	M	18072
14158991	14175407	ML	16417
14175471	14190669	EM	15199
14190646	14231915	M	41270
14231895	14258629	EM	26735
14258545	14292696	EML	34152
14292668	14457472	EM	164805
14457717	14467368	EML	9652
14467348	14476182	ML	8835
14476162	14510279	L	34118
14509962	14511591	I	1630
14511816	14513729	M	1914
14513709	15096164	EM	582456
15096257	15111002	M	14746
15110989	15112783	I	1795
15112766	15187744	L	74979
15187832	15192025	ML	4194
15192079	15255013	EML	62935
15255033	15318007	EM	62975
15318020	15329568	M	11549
15329597	15504634	EM	175038
15504866	15524663	EML	19798
15524634	15551822	L	27189
15552067	15557196	I	5130
15557291	15565563	M	8273
15565755	15723530	EM	157776
15723510	15725581	M	2072
15725561	15727697	ML	2137
15727811	15781864	L	54054
15781844	15785195	ML	3352
15785155	15789213	M	4059
15789193	15982169	EM	192977
15982297	15986147	M	3851
15986187	15996794	ML	10608
15996800	16155757	L	158958
16155735	16171780	ML	16046
16171760	16241946	EML	70187
16241926	16493817	EM	251892
16493798	16524022	EML	30225
16523997	17048725	EM	524729
17048705	17063332	M	14628
17062460	17080994	ML	18535
17081047	17082854	EML	1808
17082994	17877358	EM	794365
17877388	17886699	M	9312
17886897	17887852	I	956
17887845	17946075	L	58231
17946350	17951706	I	5357
17951686	17972583	M	20898
17972701	18368333	EM	395633
18368419	18369208	EML	790
18369369	18382961	ML	13593
18387529	18391671	M	4143
18390694	18585042	EM	194349
