# Supplementary material for: Arabidopsis thaliana Chromosome 4 Replicates in Two Phases That Correlate with Chromatin State
Source: PLoS Genet. 2010 Jun 10;6(6):e1000982. doi: 10.1371/journal.pgen.1000982 (PMC2883604; doi:10.1371/journal.pgen.1000982)
Supplement: Table S6 — Distribution of probe class with respect to replication time. (0.03 MB XLS) [file pgen.1000982.s011.xls]

## Sheet: phyper.upper.mat.txt
Table S6. Distribution of probe class with respect to replication time.
	P-values for enrichment								P-values for depletion								Probe counts
Probe Class	E	EL	EM	EML	I	L	M	ML	E	EL	EM	EML	I	L	M	ML	E	EL	EM	EML	I	L	M	ML	total
Gene	1	1	6.768e-131	0.04992	1	1	1.60224e-11	5.3568e-24	1	1.1784e-07	1	1	1	3.72864e-212	1	1	22	115	4207	654	152	3029	438	701	9318
Gene+Repeat	1	1	0.414048	1	1	1	1	1	0.50208	1	1	1	1	0.0345408	1	1	3	49	1404	267	54	1529	137	228	3671
Repeat	0.0080064	1	1	1	1	1	1	1	1	1	1	1	1	1	1	1	9	17	204	45	16	244	13	22	570
Repeat.AR12	1	2.40432e-10	1	1	1	1	1	1	1	1	0.92736	1	1	1	1	1	0	8	0	0	0	6	0	0	14
Repeat.AR3	1	1	1	1	1.00944e-23	1	1	1	1	1	0.0260256	1	1	1	1	1	0	0	0	0	16	6	0	0	22
Repeat.ATCLUST1	1	1	0	1	1	1	1	1	1	1	1	1	1	1	1	1	0	0	10	0	0	0	0	0	10
Repeat.ATENSAT1	1	1	1	1	1	0	1	1	1	1	1	1	1	1	1	1	0	0	0	0	0	9	0	0	9
Repeat.ATENSAT2	1	1	1	1	1	0	1	1	1	1	0.24288	1	1	1	1	1	0	0	0	0	0	17	0	0	17
Repeat.ATMSAT1	1	1	1	1	1	0	1	1	1	1	1	1	1	1	1	1	0	0	0	0	0	2	0	0	2
Repeat.ATSAT	1	1	0	1	1	1	1	1	1	1	1	1	1	1	1	1	0	0	1	0	0	0	0	0	1
Retrotransposon.LTR.Copia.ATCOPIA	1	1	1	1	2.46384e-08	1.35552e-21	1	1	1	1	2.25792e-29	1	1	1	1	1	1	4	57	22	31	315	22	16	468
Retrotransposon.LTR.Copia.CASTOR	1	1	1	1	1	0	1	1	1	1	1	1	1	1	1	1	0	0	0	0	0	3	0	0	3
Retrotransposon.LTR.Copia.ENDOVIR1	1	1	1	1	1	1	1	1	1	1	1	1	1	1	1	1	0	0	1	0	0	1	0	0	2
Retrotransposon.LTR.Copia.META	1	1	1	1	1	1	1	1	1	1	1	1	1	1	1	1	0	0	8	0	0	10	0	0	18
Retrotransposon.LTR.Gypsy.ATGP	1	1	1	1	1	3.48912e-62	1	1	1	1	4.9584e-49	0.005904	1	1	1	1	0	7	2	3	1	258	5	6	282
Retrotransposon.LTR.Gypsy.ATHILA	1	1	1	1	1	2.34239999966876e-312	1	1	1	1	1.92144e-182	6.8112e-19	0.00136032	1	1.8264e-14	7.5744e-24	1	9	7	6	2	977	0	0	1002
Retrotransposon.LTR.Gypsy.ATLANTYS	1	1	1	1	1	3.77808e-69	1	1	1	1	4.9344e-44	1.30992e-05	1	1	1	9.5808e-05	0	0	3	0	8	251	3	0	265
Retrotransposon.LTR.Gypsy.ATRE1	1	1	1	1	1	1	1	1	1	1	1	1	1	1	1	1	0	0	1	0	0	2	0	0	3
Retrotransposon.LTR.Gypsy.ATTIRTA1	1	1	1	1	1	1	1	1	1	1	1	1	1	1	1	1	0	0	0	1	0	2	0	0	3
Retrotransposon.LTR.Gypsy.META1	1	1	1	1	1	0.8808	1	1	1	1	1	1	1	1	1	1	0	0	4	2	0	16	0	0	22
Retrotransposon.LTR.Gypsy.ROMANI	1	1	1	1	1	0	1	1	1	1	1	1	1	1	1	1	0	0	0	0	0	10	0	0	10
Retrotransposon.LTR.Gypsy.TA	1	1	1	1	1	0	1	1	1	1	1	1	1	1	1	1	0	0	0	0	0	9	0	0	9
Retrotransposon.LTR.Gypsy.TAT	1	1	1	1	1	2.45568e-05	1	1	1	1	0.7512	1	1	1	1	1	0	0	2	0	0	23	0	0	25
Retrotransposon.nonLTR.ATLINE	1	1	1	1	1	2.00736e-15	1	1	1	1	2.53632e-21	1	1	1	1	1	2	11	31	19	5	204	7	17	296
Retrotransposon.nonLTR.ATSINE	1	1	1	1	1	1	1	1	1	1	1	1	1	1	1	1	0	2	12	2	1	13	2	3	35
Retrotransposon.nonLTR.AtSB	1	0.00198864	1	1	1	1	1	1	1	1	1	1	1	1	1	1	0	3	0	0	0	4	0	0	7
Retrotransposon.nonLTR.TSCL	1	0.468864	1	1	1	1	1	1	1	1	1	1	1	1	1	1	0	2	0	2	0	7	0	0	11
Transposon.MuDR.TIR.ATMU	0.137136	1	1	1	1	0.0017328	1	1	1	1	9.9312e-07	1	1	1	1	1	3	6	9	10	1	64	0	3	96
Transposon.MuDR.TIR.VANDAL	1	1	1	1	1	2.1144e-107	1	1	1	1	2.64528e-83	1	0.17208	1	1.68384e-07	5.28e-05	1	10	18	33	1	512	0	8	583
Transposon.MuDR.nonTIR.ARNOLD	1	1	1	1	1	1.128e-12	1	1	1	1	1.00416e-07	1	1	1	1	1	0	3	5	0	2	70	2	0	82
Transposon.MuDR.nonTIR.ATDNA1T9	1	1	1	1	1	1	1	1	1	1	0.0068112	1	1	1	1	1	0	1	0	3	0	17	0	4	25
Transposon.MuDR.nonTIR.ATDNAI	1	1	1	1	1	0	1	1	1	1	1	1	1	1	1	1	0	0	0	0	0	6	0	0	6
Transposon.MuDR.nonTIR.ATDNAI26T9	1	1	1	1	1	0	1	1	1	1	1	1	1	1	1	1	0	0	0	0	0	3	0	0	3
Transposon.MuDR.nonTIR.ATDNAI27T9	1	1	1	1	1	0.105264	1	1	1	1	1	1	1	1	1	1	0	0	1	1	0	12	0	0	14
Transposon.MuDR.nonTIR.ATHATN9	1	1	1	1	1	0	1	1	1	1	1	1	1	1	1	1	0	0	0	0	0	1	0	0	1
Transposon.MuDR.nonTIR.ATN9	1	1	1	1	1	1	1	1	1	1	1	1	1	1	1	1	0	0	1	0	0	6	0	0	7
Transposon.nonMuDR.Brody.BOMZH	1	1	1	1	1	0.412176	1	1	1	1	1	1	1	1	1	1	0	0	1	0	2	14	1	0	18
Transposon.nonMuDR.Brody.BRODYAGA	1	1	1	1	1	1	1	1	1	1	1	1	1	1	1	1	0	1	8	5	0	26	0	2	42
Transposon.nonMuDR.EnSpM.ATENSPM	1	1	1	1	1	4.35408e-38	1	1	1	1	8.9952e-25	0.00408624	1	1	0.6648	0.015504	0	7	5	0	4	162	0	0	178
Transposon.nonMuDR.HAT.ATHAT	1	1	1	1	1	0.00072096	1	1	1	1	4.968e-05	1	1	1	1	1	1	4	24	2	2	93	10	11	147
Transposon.nonMuDR.HAT.SIMPLEHAT	1	1	1	1	1	1	1	1	1	1	1	1	1	1	1	1	0	2	7	4	2	26	1	3	45
Transposon.nonMuDR.HAT.TAG	1	1	1	1	1	1	1	1	1	1	1	1	1	1	1	1	0	0	6	0	0	16	0	2	24
Transposon.nonMuDR.Harbinger.HARBINGER	1	1	1	1	1	1	1	1	1	1	0.72528	1	1	1	1	1	0	0	4	3	0	22	0	5	34
Transposon.nonMuDR.Harbinger.SIMPLEGUY1	1	1	1	1	1	1	1	1	1	1	1	1	1	1	1	1	0	0	4	0	0	11	0	0	15
Transposon.nonMuDR.Helitron.ATREP	1	1.53312e-43	1	1	1	1	1	1	1	1	3.17328e-08	1	1	1	1	1	4	66	76	15	11	169	14	14	369
Transposon.nonMuDR.Helitron.HELITRON	1	1	1	1	0.000442464	4.23504e-17	1	1	1	1	1.00368e-14	1	1	1	1	0.0326352	0	7	22	7	15	157	1	1	210
Transposon.nonMuDR.IS112.ATIS112A	1	1	1	0.0076032	1	1	1	1	1	1	1	1	1	1	1	1	0	0	4	7	0	7	2	0	20
Transposon.nonMuDR.Mariner	1	1	1	1	1	0	1	1	1	1	1	1	1	1	1	1	0	0	0	0	0	2	0	0	2
Transposon.nonMuDR.Mariner.ATDNATA1	1	1	1	1	1	1	1	1	1	1	1	1	1	1	1	1	0	0	3	0	0	1	0	0	4
Transposon.nonMuDR.Mariner.ATHPOGO	0.271776	0.145296	1	1	1	1	1	1	1	1	0.00374496	1	1	1	1	1	2	5	4	4	0	25	5	4	49
Transposon.nonMuDR.Mariner.ATTIR16T3A	1	1	1	0.103248	1	1	1	1	1	1	1	1	1	1	1	1	0	1	0	3	0	1	0	1	6
Transposon.nonMuDR.Mariner.ATTIRTA1	1	1	1	1	1	1	1	1	1	1	1	1	1	1	1	1	0	0	1	0	0	5	0	0	6
Transposon.nonMuDR.Mariner.ATTIRX1	1	1	1	1	1	1	1	1	1	1	1	1	1	1	1	1	0	1	6	1	0	10	0	0	18
Transposon.nonMuDR.Mariner.DT1	1	1	1	1	1	1	1	1	1	1	1	1	1	1	1	1	0	0	3	3	0	3	2	0	11
Transposon.nonMuDR.Other.ATDNA12T3	1	1	1	1	1	5.2224e-06	1	1	1	1	0.355632	1	1	1	1	1	0	0	2	0	0	25	0	0	27
Transposon.nonMuDR.Other.LIMPET	1	1	1	1	1	1	1	1	1	1	1	1	1	1	1	1	0	0	0	1	0	9	2	0	12
Transposon.nonMuDR.Other.RP1	1	1	1	1	1	1	1	1	1	1	1	1	1	1	1	1	0	0	1	0	0	7	1	0	9
Transposon.nonMuDR.TA	1	1	1	1	1	0	1	1	1	1	1	1	1	1	1	1	0	0	0	0	0	3	0	0	3
Transposon.nonMuDR.TNAT	1	1	1	1	1	1	1	1	1	1	1	1	1	1	1	1	0	2	2	1	0	16	1	2	24
Unannotated	0.1068	1	1.01568e-48	1	1	1	1	1	1	1	1	1	1	3.84048e-43	1	1	21	57	1476	217	44	1005	99	141	3060
																	70	400	7647	1343	370	9453	768	1194
																	27	228	1964	472	174	5419	231	352
																	38.5714	57	25.6833	35.1452	47.027	57.3257	30.0781	29.4807
