# Supplementary material for: Arabidopsis thaliana Chromosome 4 Replicates in Two Phases That Correlate with Chromatin State
Source: PLoS Genet. 2010 Jun 10;6(6):e1000982. doi: 10.1371/journal.pgen.1000982 (PMC2883604; doi:10.1371/journal.pgen.1000982)
Supplement: Table S7 — Analysis of initiation and termination zones between early, mid and late S phase cells. (0.02 MB XLS) [file pgen.1000982.s012.xls]

## Sheet: zones
Table S7. Analysis of intitation and termination zones between early, mid and late S phase cells
Experiment	Initiation	Termination	Termination (Final)
early experiment	159	159	95
mid experiment	149	149	102
late experiment	158	158	141
early experiment only	50	45	2
mid experiment only	44	27	2
late experiment only	150	64	48
early & mid experiments	101	40	19
mid & late experiments	0	20	19
early & late experiments	4	12	12
early, mid & late experiments	4	62	62
