# Supplementary material for: Arabidopsis thaliana Chromosome 4 Replicates in Two Phases That Correlate with Chromatin State
Source: PLoS Genet. 2010 Jun 10;6(6):e1000982. doi: 10.1371/journal.pgen.1000982 (PMC2883604; doi:10.1371/journal.pgen.1000982)
Supplement: Table S10 — Coordinates and replication time for chr4 replication domains. (0.02 MB XLS) [file pgen.1000982.s015.xls]

## Sheet: replicons.new.df.txt
Table S10. Coordinates and replication time for chr4 replication domains.
low_coord	high_coord	length	domain_length	loess_timing
124045	333288	114366	209244	L
333289	420182	86894	86894	M
420183	590150	109980	169968	L
590151	663764	73614	73614	EML
663765	792286	128522	128522	EM
792287	880803	88517	88517	EML
880804	1139424	99067	258621	EM
1139425	1218901	79477	79477	L
1218902	1342326	123425	123425	EM
1342327	2366982	58840	1024656	L
2366983	2448768	81786	81786	EML
2448769	2534355	85587	85587	L
2534356	2603150	68795	68795	EML
2603151	7108704	148766	4505554	L
7108705	7493130	154370	384426	EM
7493131	8320694	152768	827564	L
8320695	8425844	105150	105150	EM
8425845	9231835	154762	805991	L
9231836	9315560	83725	83725	EML
9315561	9522702	65502	207142	EM
9522703	9646509	123807	123807	L
9646510	9963536	154247	317027	EM
9963537	10063543	100007	100007	EML
10063544	10540839	52141	477296	EM
10540840	11202983	113655	662144	L
11202984	11337167	52911	134184	ML
11337168	11484537	147370	147370	EM
11484538	11582841	98304	98304	EML
11582842	12562292	121534	979451	EM
12562293	12707092	88270	144800	L
12707093	12823684	116592	116592	EM
12823685	12912890	89206	89206	ML
12912891	13378186	159020	465296	EM
13378187	13460166	81980	81980	EML
13460167	14149356	123244	689190	EM
14149357	14220526	71170	71170	M
14220527	15140500	58841	919974	EM
15140501	15227674	87174	87174	L
15227675	16017157	88400	789483	EM
16017158	16205530	66053	188373	L
16205531	18526238	123126	2320708	EM
